# Supplementary material
Source: PubMed Central journal article supplement (PMC3251092)
Supplement: 1108776109_pnas.201108776SI.pdf [file 1108776109_pnas.201108776SI.pdf]

# Supporting Information

Vuyyuru et al. 10.1073/pnas.1108776109

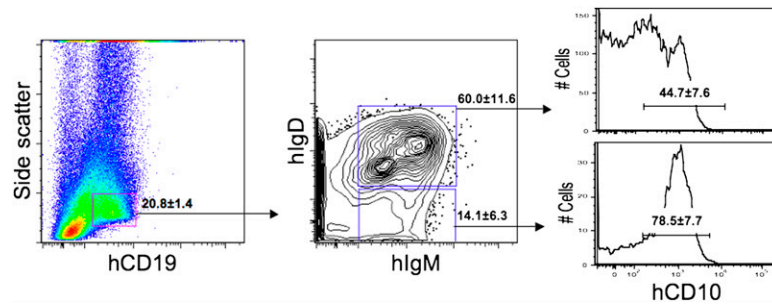

**Fig. S1.** Analysis of B cells in HISmice. Spleen cells were stained with antibodies specific for human CD19, CD10, IgM, and IgD, and analyzed by flow cytometry. All B cells were first identified by CD19 positivity and were further resolved (indicated by arrows) as IgM<sup>+</sup> IgD<sup>+</sup>, and IgM<sup>+</sup> IgD<sup>low</sup>, and the CD10 expression was determined. The frequency values of the indicated B-cell populations are shown within the plots. The data were generated by analyzing a minimum of 20,000 cells and are representative of three to five mice. Five percent contour plots are shown.

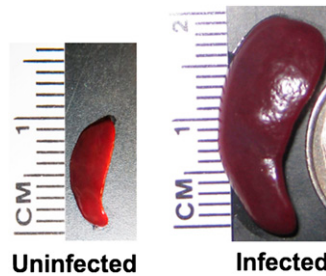

**Fig. S2.** *B. hermsii* infection of HISmice results in splenomegaly. Human hematopoietic stem cell-engrafted NSG mice were infected i.v. with  $5 \times 10^4$  *Borrelia hermsii* strain DAH-p1 and, on day 14 postinfection, spleens of three mice were excised. Spleen of a representative uninfected and infected mouse was shown.
